# Supplementary material for: Ferroptosis is an autophagic cell death process
Source: Springer Nature journal article supplement (doi:10.1038/cr.2016.95), 2016-08-12
Supplement: 41422_2016_BFcr201695_MOESM40_ESM.pdf [file 41422_2016_BFcr201695_MOESM40_ESM.pdf]

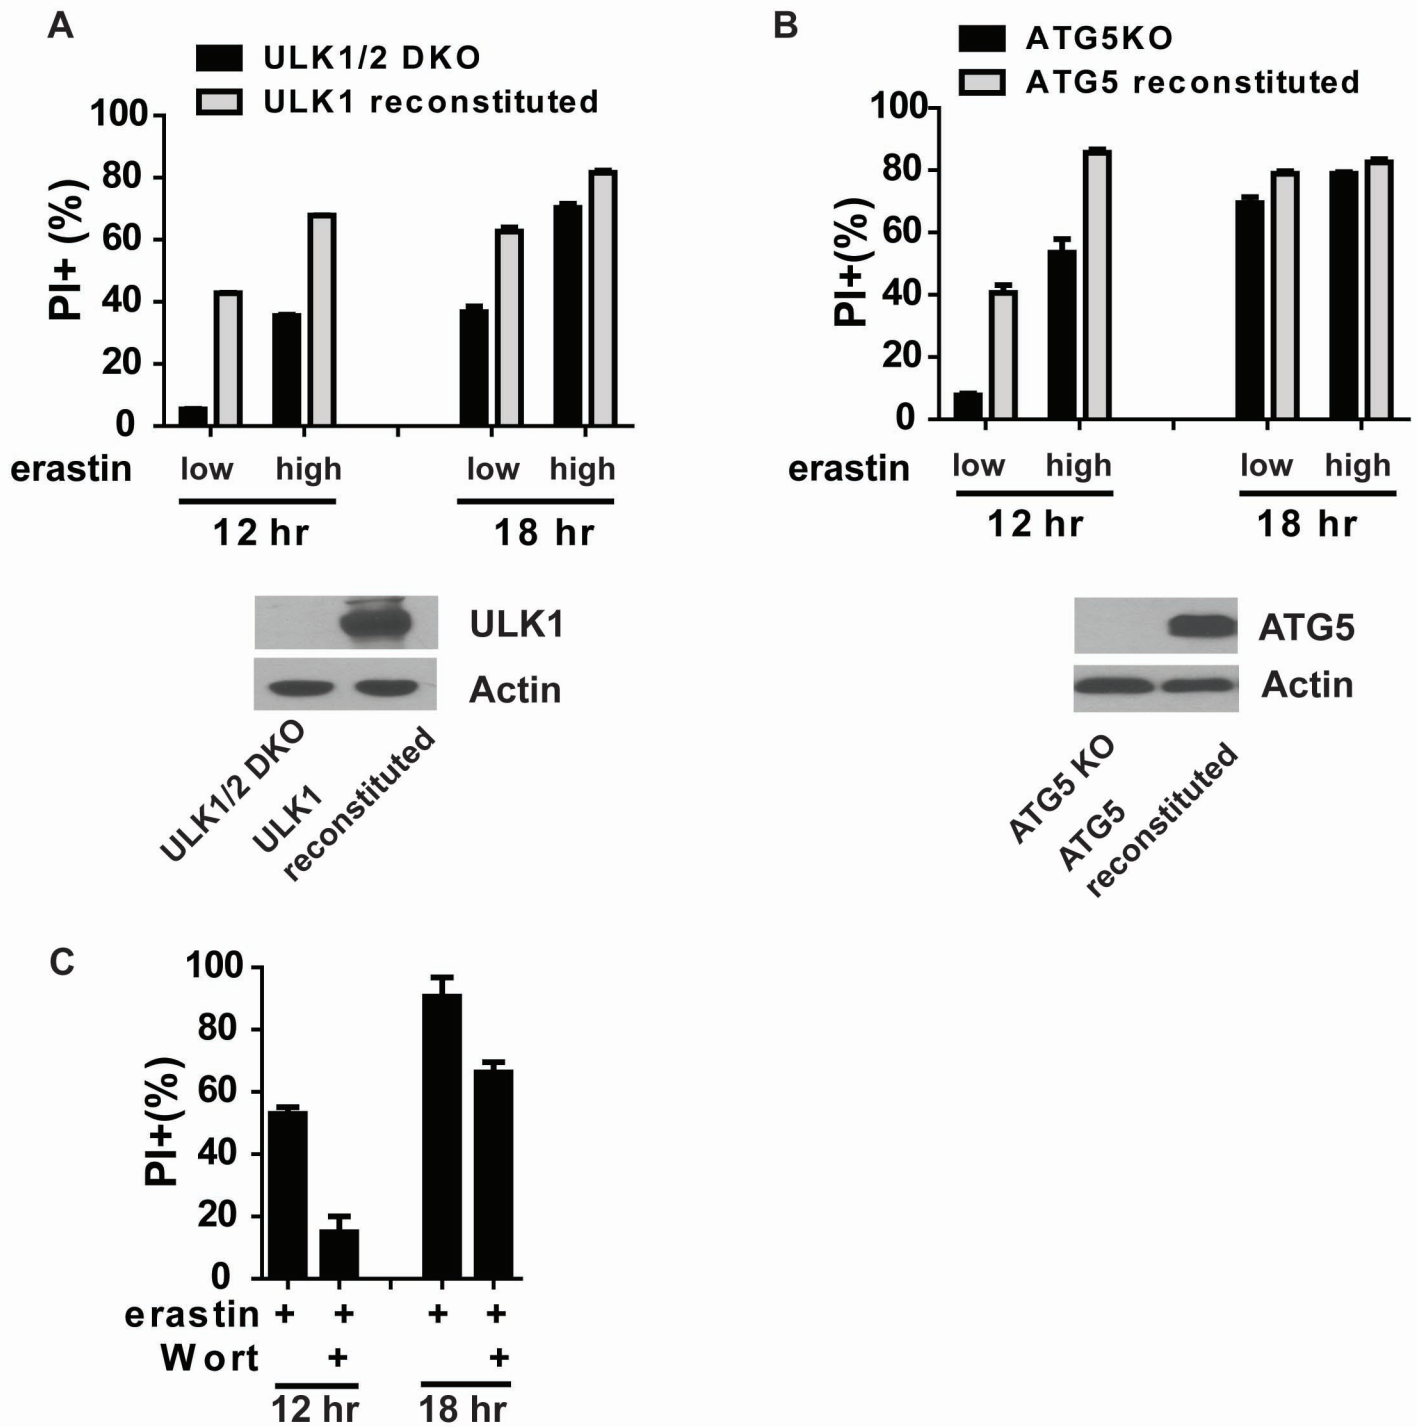

**Figure S3** Autophagy is required for ferroptosis. **(A)** ULK1 is required for ferroptosis.

ULK1/2DKO MEFs, or ULK1/2DKO cells reconstituted with ectopic ULK1

expression, were treated as indicated. Cell death was determined by PI staining

coupled with flow cytometry. Western blot confirmed the expression of ULK1.

Erastin, low: 0.5  $\mu$ M, high: 1  $\mu$ M. **(B)** ATG5 is required for ferroptosis ATG5KO

MEFs, or ATG5KO cells reconstituted with ectopic ATG5 expression, were treated as

indicated. Cell death was determined by PI staining coupled with flow cytometry.

Western blot confirmed the expression of ATG5. Erastin, low: 0.2  $\mu$ M, high: 0.5  $\mu$ M

erastin. **(C)** Autophagy inhibitor wortmannin (Wort) inhibits ferroptosis in MEFs.

Cells were treated as indicated. Cell death was determined by PI staining coupled with

flow cytometry. Wort: 10  $\mu$ M; erastin: 1  $\mu$ M.
