# Supplementary figures and images for: Ferroptosis is an autophagic cell death process
Source: Springer Nature journal article supplement (doi:10.1038/cr.2016.95), 2016-08-12

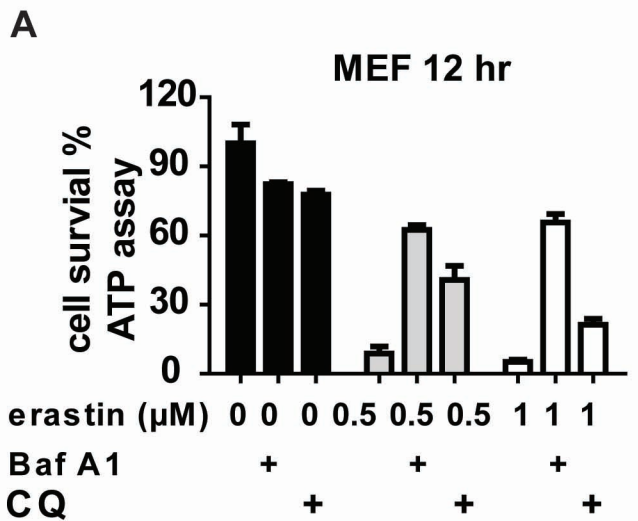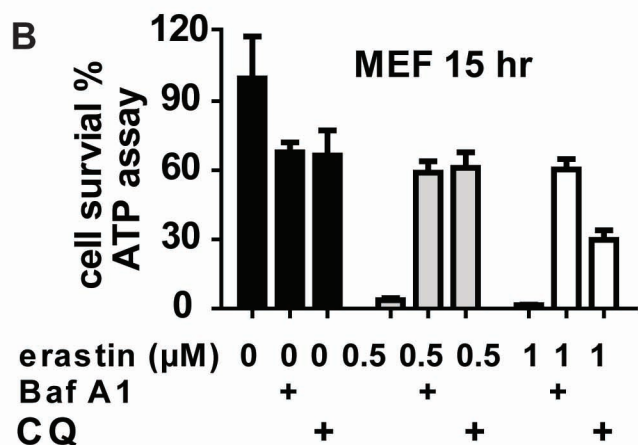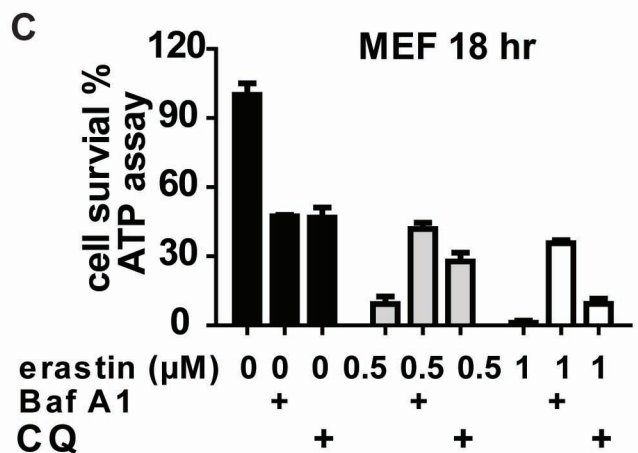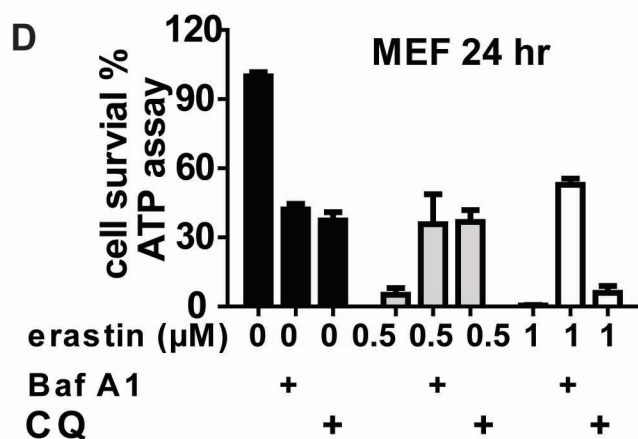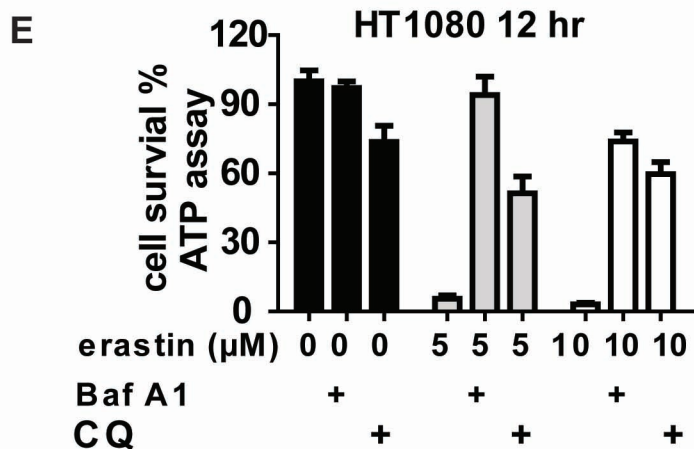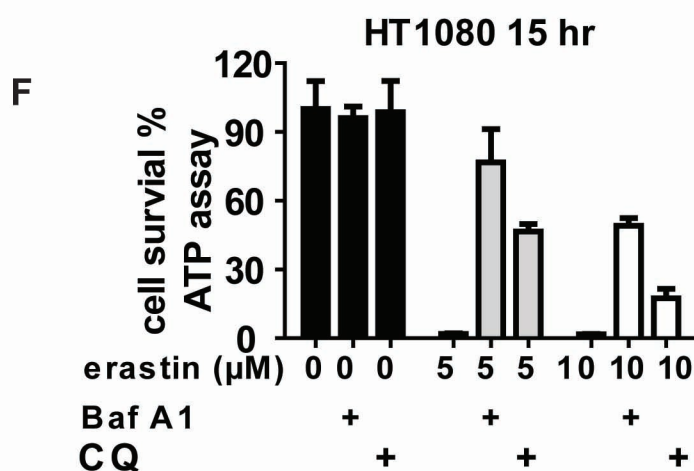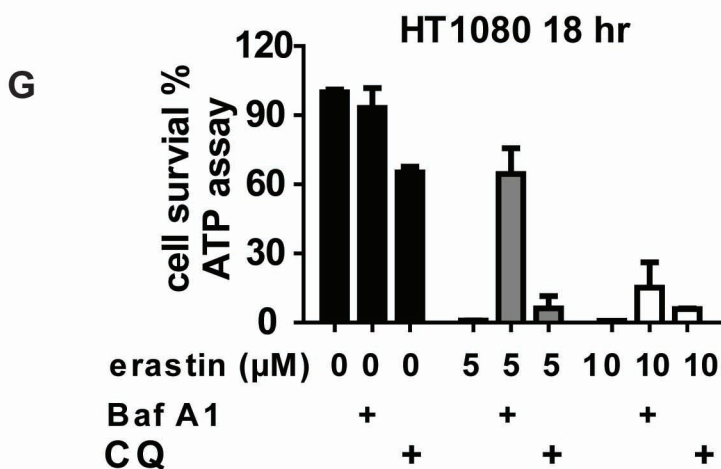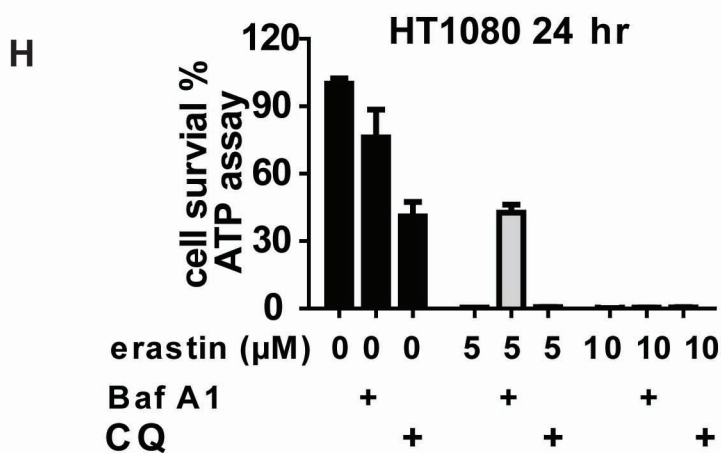

**Figure S2** The effect of autophagy inhibitors on ferroptosis is dose- and time-dependent.

Supplement: 41422_2016_BFcr201695_MOESM39_ESM.pdf [file 41422_2016_BFcr201695_MOESM39_ESM.pdf]
